# Supplementary material
Source: Springer Nature journal article supplement (https://www.springermedizin.de/resource/supplementary/12935_2011_294_MOESM3_ESM.pdf/9540246)

**a**

**Examples of lungs**

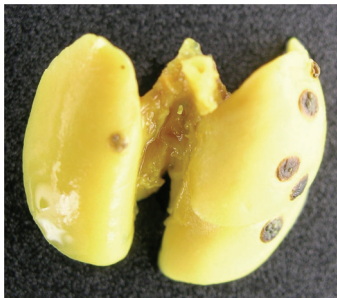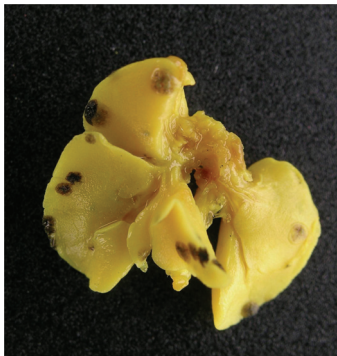

**b**

**Examples of H&E cross sections**

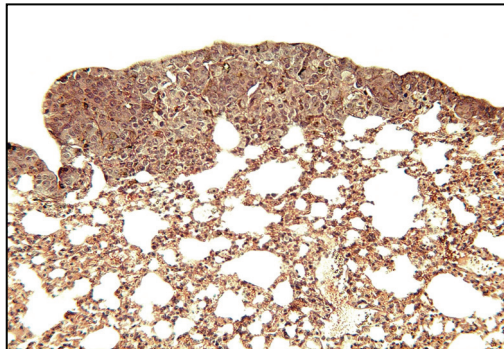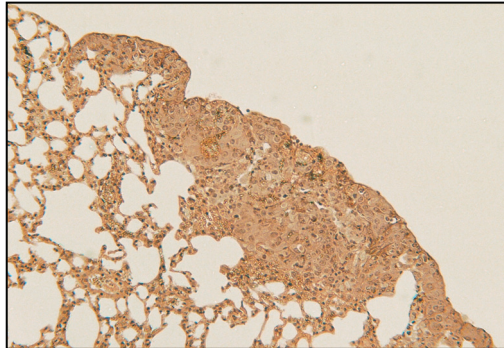

Supplement: MOESM3 [file 9540246]
